# Supplementary material for: Oxygen transport phenomena in (La,Sr)2(Ni,Fe)O4 materials
Source: Royal Society of Chemistry journal article supplement (doi:10.1039/c7ta07162k), 2017-09-13
Supplement: c7ta07162k1.pdf [file c7ta07162k1.pdf]

## Electronic Supplementary Information

### Oxygen Transport Phenomena In $(\text{La,Sr})_2(\text{Ni,Fe})\text{O}_4$ Materials

A. R. Gilev, E. A. Kiselev and V.A. Cherepanov\*

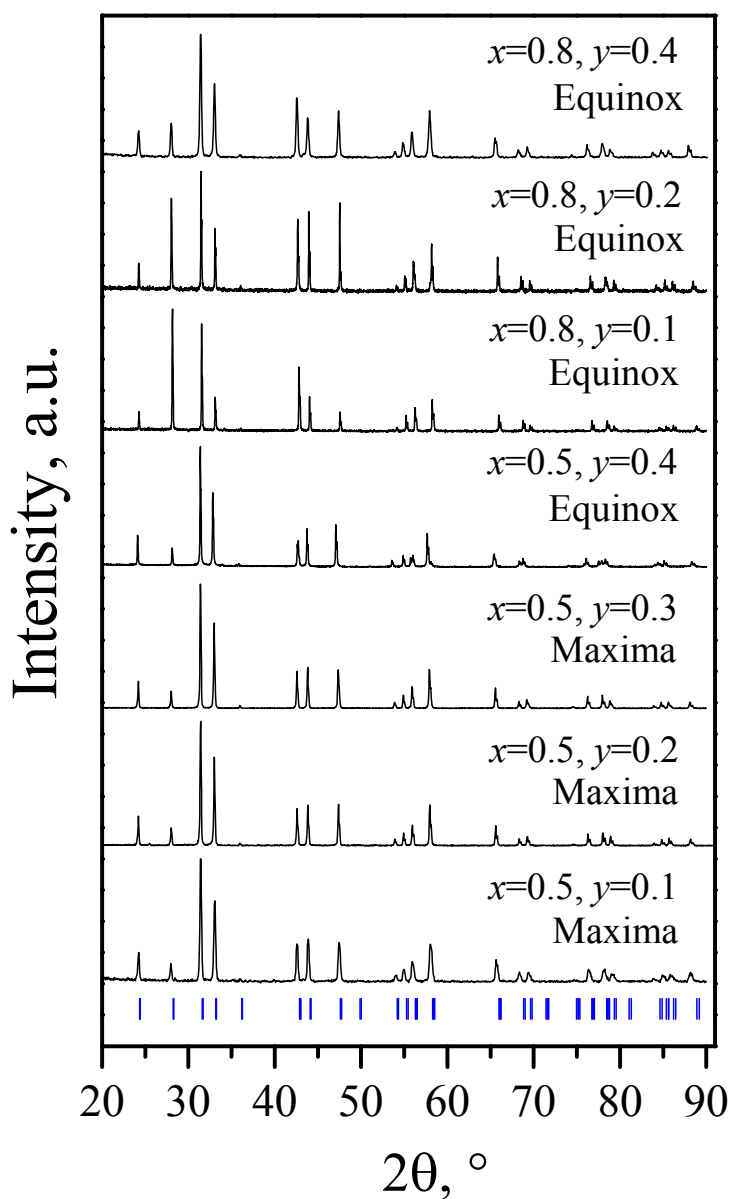

**Fig. S1** Room-temperature XRD patterns for the  $\text{La}_{2-x}\text{Sr}_x\text{Ni}_{1-y}\text{Fe}_y\text{O}_{4+\delta}$  sintered samples.

\* Department of Chemistry, Institute of Natural Sciences, Ural Federal University, Ekaterinburg, 620000, Russia. E-mail: v.a.cherepanov@urfu.ru

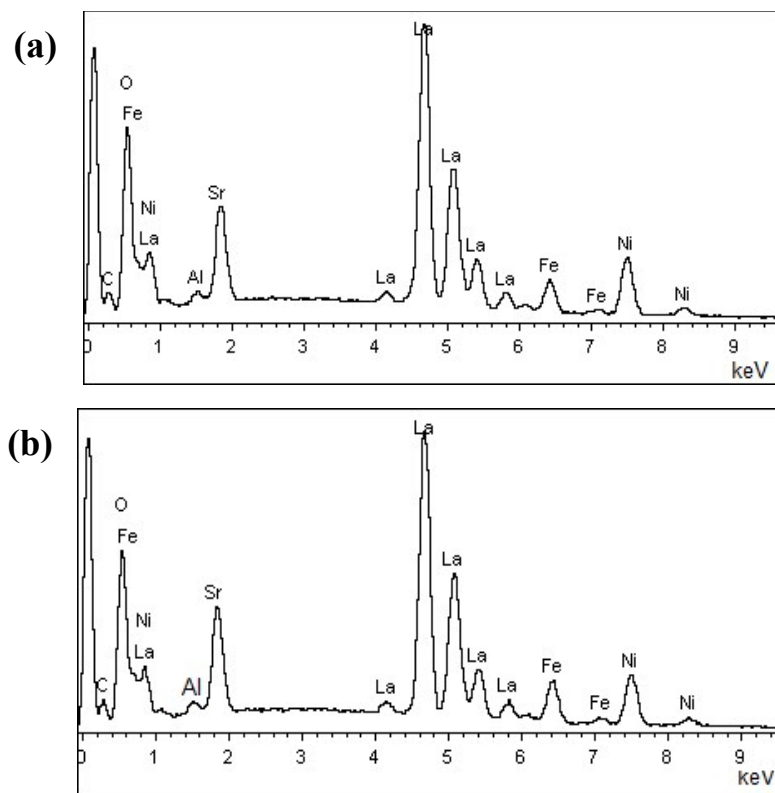

**Fig. S2** EDX spectra for the cross-sectional surface of  $\text{La}_{1.5}\text{Sr}_{0.5}\text{Ni}_{0.7}\text{Fe}_{0.3}\text{O}_{4+6}$  (a) and  $\text{La}_{1.5}\text{Sr}_{0.5}\text{Ni}_{0.6}\text{Fe}_{0.4}\text{O}_{4+6}$  (b).

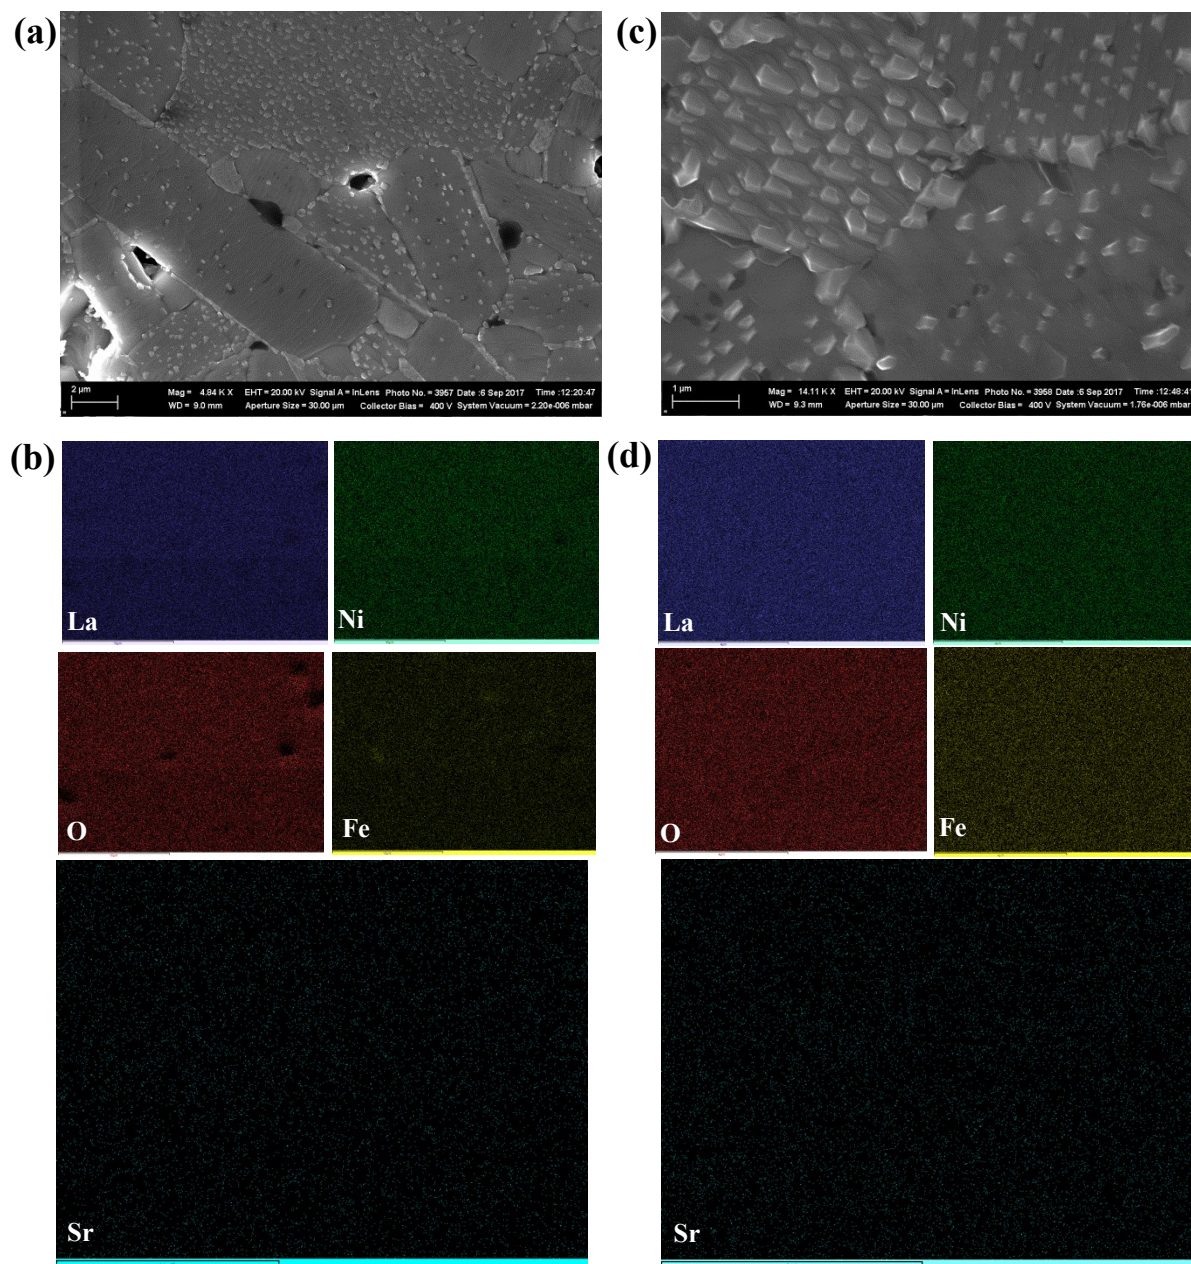

**Fig. S3** SEM micrographs and corresponding EDX mappings of the  $\text{La}_{1.5}\text{Sr}_{0.5}\text{Ni}_{0.7}\text{Fe}_{0.3}\text{O}_{4+\delta}$  (a, b) and  $\text{La}_{1.5}\text{Sr}_{0.5}\text{Ni}_{0.6}\text{Fe}_{0.4}\text{O}_{4+\delta}$  (c, d) surfaces.

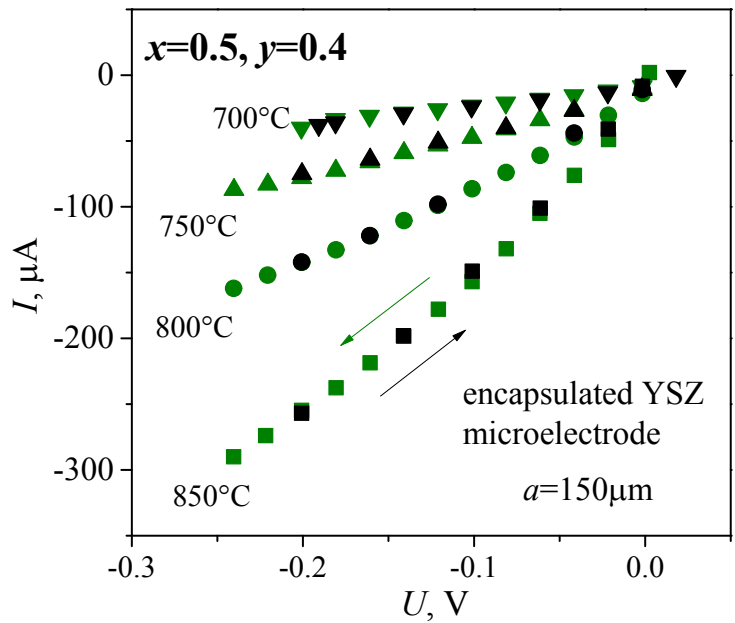

**Fig. S4** Steady-state  $I$ - $U$  curves at an encapsulated YSZ micro-electrode for  $\text{La}_{1.5}\text{Sr}_{0.5}\text{Ni}_{0.6}\text{Fe}_{0.4}\text{O}_{4+\delta}$ .
